# Supplementary material for: New homochiral ferroelectric supramolecular networks of complexes constructed by chiral S-naproxen ligand
Source: Royal Society of Chemistry journal article supplement (doi:10.1039/c2ce25138h), 2012-01-01
Supplement: c2ce25138h.pdf [file c2ce25138h.pdf]

## Supplementary Information

# New homochiral ferroelectric supramolecular networks of complexes constructed by chiral *S*-naproxen ligand

Yong-Tao Wang,<sup>\*a</sup> Gui-Mei Tang,<sup>a</sup> Wen-Zhu Wan,<sup>a</sup> Yue Wu,<sup>a</sup> Ting-Cui Tian,<sup>a</sup> Jin-Hua Wang,<sup>a</sup> Chao He,<sup>b</sup> Xi-Fa Long,<sup>\*b</sup> Jun-Jie Wang,<sup>c</sup> and Seik Weng Ng<sup>\*d</sup>

<sup>a</sup> Department of Chemical Engineering, Shandong Provincial Key Laboratory of Fine Chemicals, Shandong Polytechnic University, Jinan, 250353, P. R. China.

<sup>b</sup> Fujian Institute of Research on the Structure of Matter, Chinese Academy of Science, Fuzhou, 350002, P. R. China.

<sup>c</sup> Department of Chemistry, Anyang Normal University, Henan, 455002, P. R. China.

<sup>d</sup> Department of Chemistry, University of Malaya, Kuala Lumpur, 50603, Malaysia

\* Corresponding author. E-mail: [ceswyt@sohu.com](mailto:ceswyt@sohu.com). Fax: +086 0531 8900 0551; 8900 0551. E-mail: [lxf@fjirsm.ac.cn](mailto:lxf@fjirsm.ac.cn). Fax: Int. code +86 0591 8371 4946. E-mail: [seikweng@um.edu.my](mailto:seikweng@um.edu.my). Fax: (+60) 603 7967 4193.

### Thermogravimetric analysis (TGA)

In order to estimate the stability of complexes, their thermal behaviours were studied by TGA technique. The experiments were performed on samples composed of numerous single crystals of **1-5** under N<sub>2</sub> atmosphere with a heating rate of 10 °C·min<sup>-1</sup> in the range of 30 to 700 °C (Fig. S18, see ESI). The TGA curve of complex **1** showed that the weight loss of 19.11% between 40 and 160 °C occurs, which can be ascribed to the loss of lattice and coordination water molecules (calculated: 21.77%). Decomposition of **1** began at about 288 °C, thus forming an unidentified product. For complex **2**, the first weight loss from 30 to 150 °C corresponds to the departure of lattice and coordinated water molecules (experimental: 13.72%, calculated: 12.12%). The decomposition of naproxen ligands occurs in the temperature range 210–358 °C (experimental: 78.25%, calculated: 77.09%). Upon further increasing the temperature, resulting into the formation of an unidentified product as the residue. For **3**, a weight loss of 7.15% is observed between 30 and 180 °C, which can be assigned to the release of the free and coordination water molecules per formula unit (calculated: 8.32%). The anhydrous compound started decomposing at about 260 °C. The residue was ZnO. For complex **4**, the weight loss occurs in the temperature range 30-180 °C in the TGA curve, which can be attributed to the loss of free and coordinated water molecules (experimental: 6.03%, calculated: 8.64%). Above 310°C, rapid weight loss occurred owing to the decomposition of the organic ligands. Complex **5** releases its coordinated water molecules gradually from 90 to 180 °C (obsd 3.26%, calcd 3.06%). The decomposition of the organic components occurs at 300 °C. The residue was CdO (experimental: 18.83%, calculated: 21.80%).

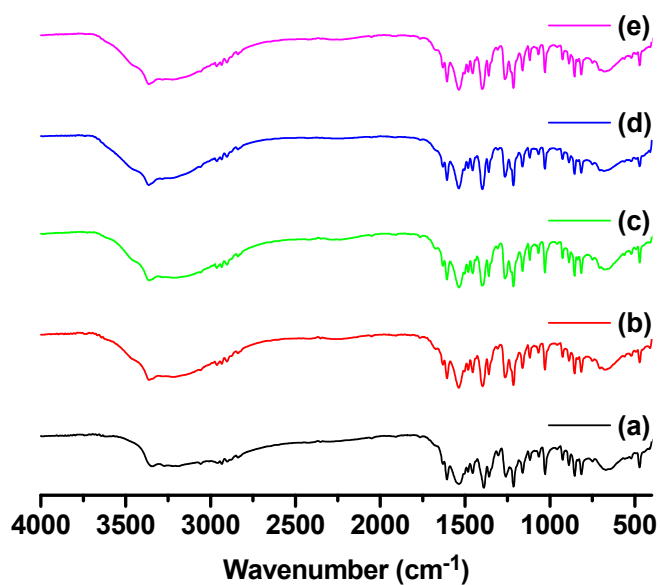

**Fig. S1** IR spectra for **1** prepared by a series of nickel salts with different anions respectively: (a)  $\text{SO}_4^{2-}$ ; (b)  $\text{NO}_3^-$ ; (c)  $\text{ClO}_4^-$ ; (d)  $\text{Cl}^-$ ; (e)  $\text{Ac}^-$ .

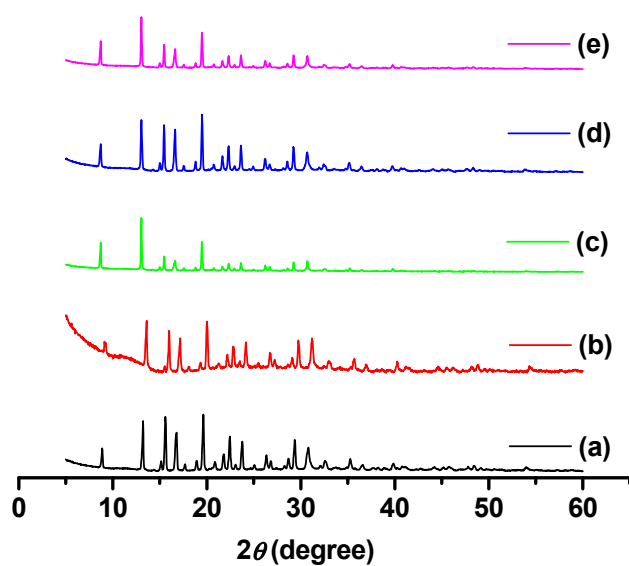

**Fig. S2** Powdered X-Ray diffraction (PXRD) patterns for **1** obtained by a series of nickel salts with different anions respectively: (a)  $\text{SO}_4^{2-}$ ; (b)  $\text{NO}_3^-$ ; (c)  $\text{ClO}_4^-$ ; (d)  $\text{Cl}^-$ ; (e)  $\text{Ac}^-$ .

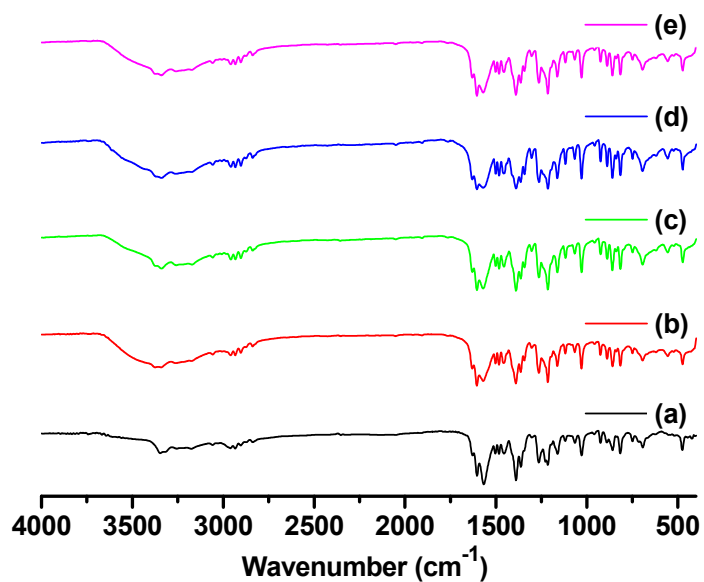

**Fig. S3** IR spectra for **2** prepared by a series of copper salts with different anions respectively: (a)  $\text{SO}_4^{2-}$ ; (b)  $\text{NO}_3^-$ ; (c)  $\text{ClO}_4^-$ ; (d)  $\text{Cl}^-$ ; (e)  $\text{Ac}^-$ .

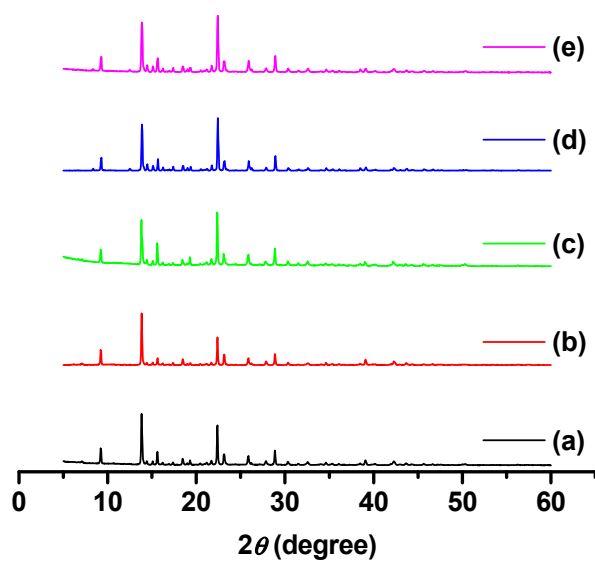

**Fig. S4** PXRD patterns for **2** obtained by a series of copper salts with different anions respectively: (a)  $\text{SO}_4^{2-}$ ; (b)  $\text{NO}_3^-$ ; (c)  $\text{ClO}_4^-$ ; (d)  $\text{Cl}^-$ ; (e)  $\text{Ac}^-$ .

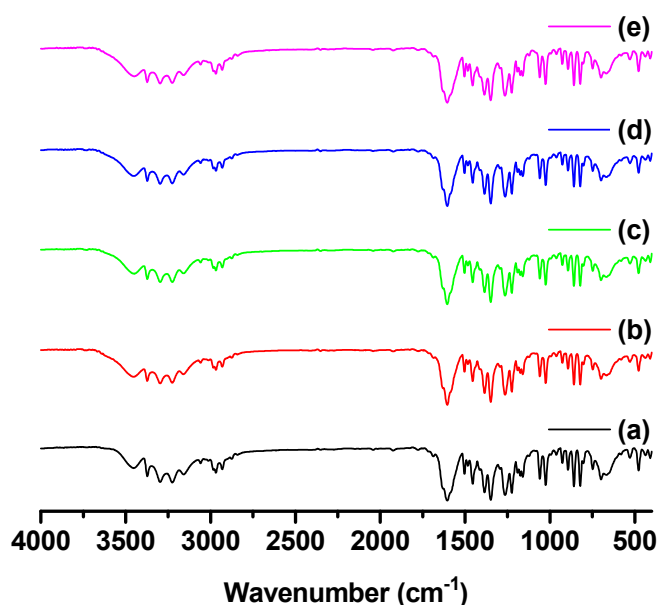

**Fig. S5** IR spectra for **3** prepared by a series of zinc salts with different anions respectively: (a)  $\text{SO}_4^{2-}$ ;  
(b)  $\text{NO}_3^-$ ; (c)  $\text{ClO}_4^-$ ; (d)  $\text{Cl}^-$ ; (e)  $\text{Ac}^-$ .

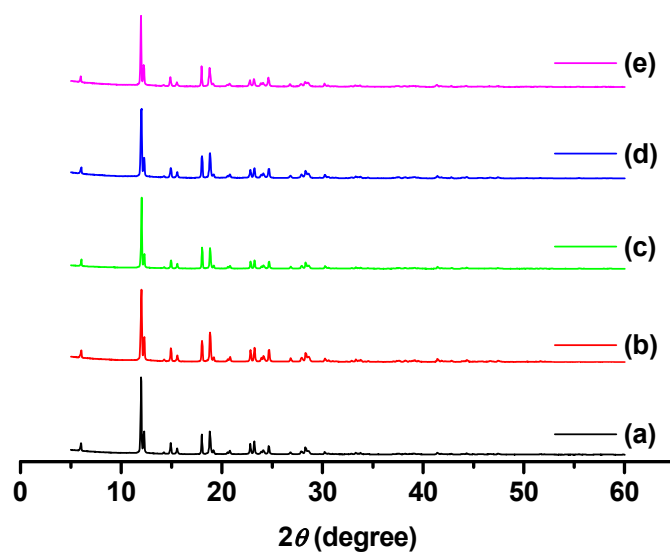

**Fig. S6** PXRD patterns for **3** obtained by a series of zinc salts with different anions respectively: (a)  
 $\text{SO}_4^{2-}$ ; (b)  $\text{NO}_3^-$ ; (c)  $\text{ClO}_4^-$ ; (d)  $\text{Cl}^-$ ; (e)  $\text{Ac}^-$ .

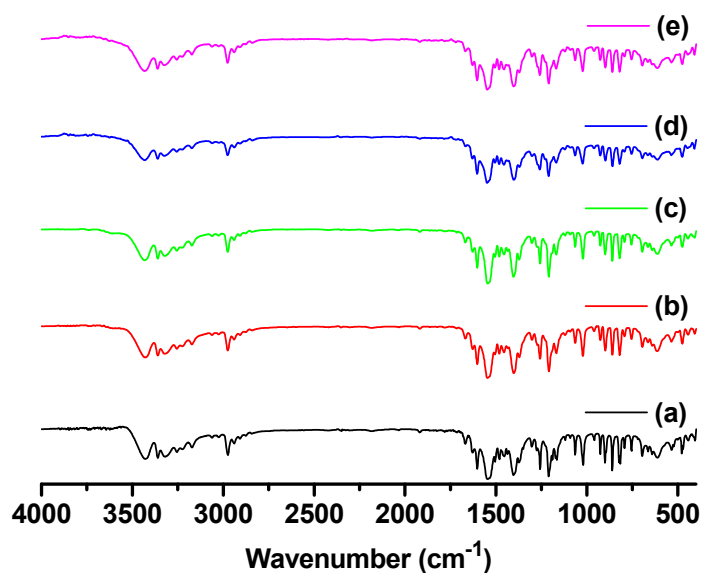

**Fig. S7** IR spectra for **4** prepared by a series of cadmium salts with different anions respectively: (a)

SO<sub>4</sub><sup>2-</sup>; (b) NO<sub>3</sub><sup>-</sup>; (c) ClO<sub>4</sub><sup>-</sup>; (d) Cl<sup>-</sup>; (e) Ac<sup>-</sup>.

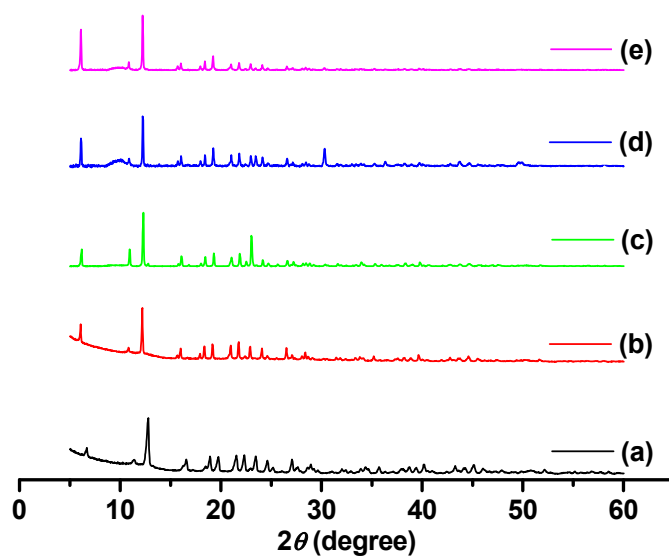

**Fig. S8** PXRD patterns for **4** obtained by a series of cadmium salts with different anions respectively:

(a) SO<sub>4</sub><sup>2-</sup>; (b) NO<sub>3</sub><sup>-</sup>; (c) ClO<sub>4</sub><sup>-</sup>; (d) Cl<sup>-</sup>; (e) Ac<sup>-</sup>.

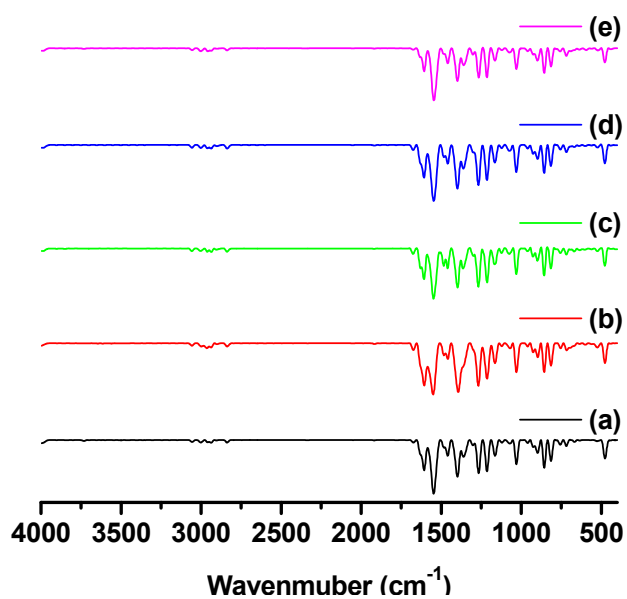

**Fig. S9** IR spectra for **5** prepared by a series of cadmium salts with different anions respectively: (a) SO<sub>4</sub><sup>2-</sup>; (b) NO<sub>3</sub><sup>-</sup>; (c) ClO<sub>4</sub><sup>-</sup>; (d) Cl<sup>-</sup>; (e) Ac<sup>-</sup>.

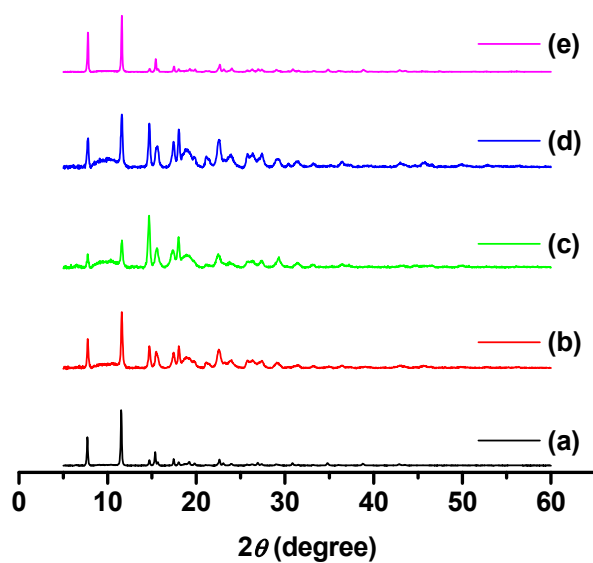

**Fig. S10** PXRD patterns for **5** obtained by a series of cadmium salts with different anions respectively: (a) SO<sub>4</sub><sup>2-</sup>; (b) NO<sub>3</sub><sup>-</sup>; (c) ClO<sub>4</sub><sup>-</sup>; (d) Cl<sup>-</sup>; (e) Ac<sup>-</sup>.

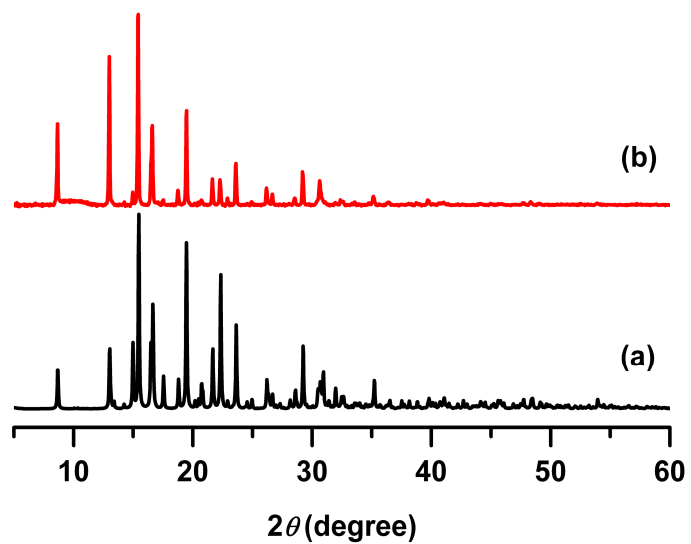

**Fig. S11.** X-Ray diffraction (XRD) patterns for **1**: (a) simulated; (b) powdered.

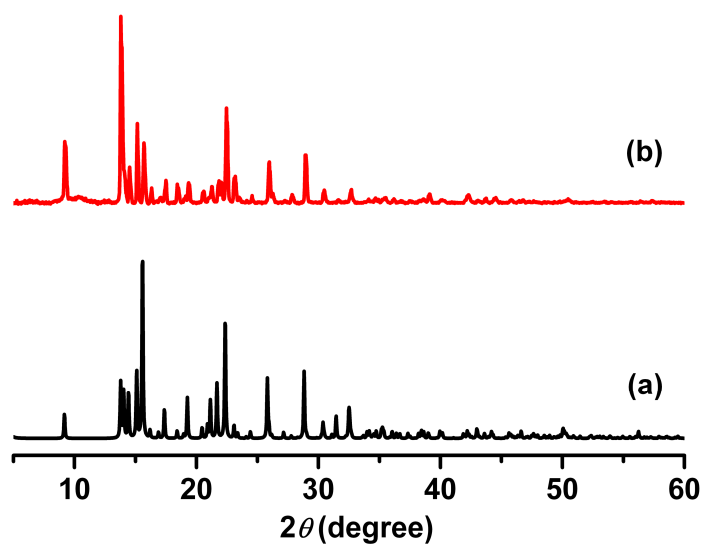

**Fig. S12.** XRD patterns for **2**: (a) simulated; (b) powdered.



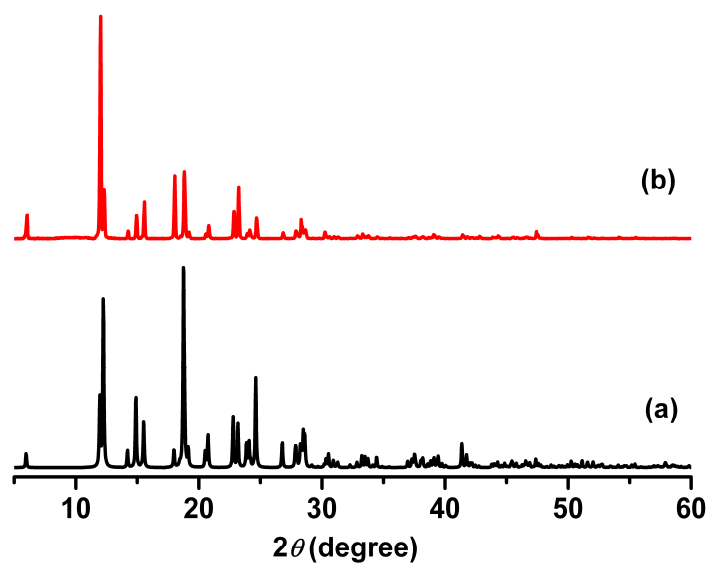

**Fig. S13.** XRD patterns for 3: (a) simulated; (b) powdered.

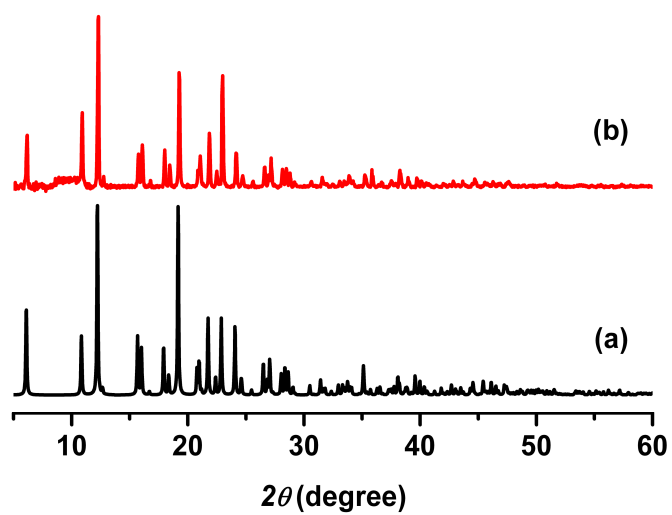

**Fig. S14.** XRD patterns for 4: (a) simulated; (b) powdered.

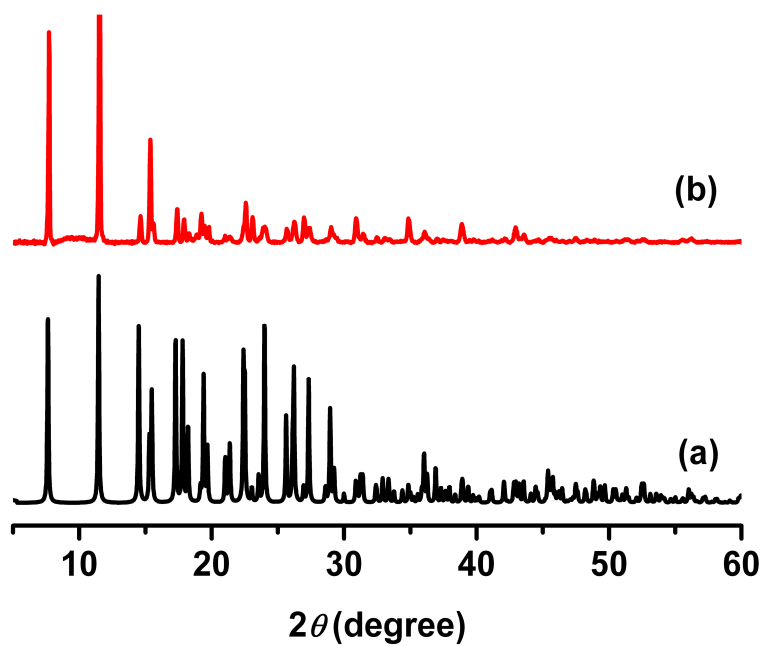

**Fig. S15.** XRD patterns for **5**: (a) simulated; (b) powdered.

**Table S1** Selected bond lengths (Å) and angles (°) for compounds **1-5**

| <b>1</b>                 |            |                                        |            |
|--------------------------|------------|----------------------------------------|------------|
| Ni1–O4W                  | 2.121(7)   | Ni2–O11W                               | 2.104(6)   |
| Ni1–O5W                  | 2.122(6)   | Ni2–O10W                               | 2.093(8)   |
| Ni1–O6W                  | 2.056(7)   | Ni2–O12W                               | 2.096(7)   |
| Ni1–O3W                  | 2.099(8)   | Ni2–O7W                                | 2.107(8)   |
| Ni1–O1W                  | 2.061(7)   | Ni2–O9W                                | 2.103(8)   |
| Ni1–O2W                  | 2.108(8)   | Ni2–O8W                                | 2.108(8)   |
| O4W–Ni1–O6W              | 88.8(3)    | O8W–Ni2–O11W                           | 177.4(3)   |
| O5W–Ni1–O6W              | 85.3(3)    | O9W–Ni2–O11W                           | 91.6(3)    |
| O2W–Ni1–O4W              | 90.3(3)    | O10W–Ni2–O12W                          | 91.3(3)    |
| O1W–Ni1–O2W              | 92.9(3)    | O11W–Ni2–O12W                          | 88.1(2)    |
| O1W–Ni1–O3W              | 93.4(3)    | O9W–Ni2–O12W                           | 84.8(3)    |
| O1W–Ni1–O4W              | 85.6(3)    | O10W–Ni2–O11W                          | 84.6(3)    |
| O1W–Ni1–O5W              | 88.6(2)    | O8W–Ni2–O9W                            | 91.0(3)    |
| O1W–Ni1–O6W              | 171.9(3)   | O8W–Ni2–O10W                           | 92.8(3)    |
| O2W–Ni1–O3W              | 90.7(3)    | O7W–Ni2–O8W                            | 88.5(3)    |
| O3W–Ni1–O4W              | 178.7(3)   | O7W–Ni2–O9W                            | 92.6(3)    |
| O2W–Ni1–O5W              | 177.4(3)   | O7W–Ni2–O10W                           | 91.3(3)    |
| O2W–Ni1–O6W              | 93.0(3)    | O7W–Ni2–O11W                           | 91.5(3)    |
| O4W–Ni1–O5W              | 87.7(2)    | O7W–Ni2–O12W                           | 177.3(3)   |
| O3W–Ni1–O5W              | 91.3(3)    | O8W–Ni2–O12W                           | 92.2(3)    |
| O3W–Ni1–O6W              | 92.0(3)    | O9W–Ni2–O10W                           | 174.7(3)   |
| <b>2<sup>i</sup></b>     |            |                                        |            |
| Cu1–O1                   | 1.960(2)   | Cu1–O2W                                | 1.986(4)   |
| Cu1–O1W                  | 2.375(5)   |                                        |            |
| O1–Cu1–O1W               | 85.49(17)  | O1W–Cu1–O2W <sup>a</sup>               | 82.4(3)    |
| O1–Cu1–O2W               | 91.72(13)  | O1 <sup>a</sup> –Cu1–O2W               | 88.41(13)  |
| O1–Cu1–O1 <sup>a</sup>   | 179.07(17) | O1W <sup>a</sup> –Cu1–O2W              | 82.4(3)    |
| O1–Cu1–O1W <sup>a</sup>  | 93.61(17)  | O2W–Cu1–O2W <sup>a</sup>               | 164.7(3)   |
| O1–Cu1–O2W <sup>a</sup>  | 88.41(13)  | O1 <sup>a</sup> –Cu1–O1W <sup>a</sup>  | 85.49(17)  |
| O1W–Cu1–O2W              | 112.9(3)   | O1 <sup>a</sup> –Cu1–O2W <sup>a</sup>  | 91.72(13)  |
| O1 <sup>a</sup> –Cu1–O1W | 93.61(17)  | O1W <sup>a</sup> –Cu1–O2W <sup>a</sup> | 112.9(3)   |
| O1W–Cu1–O1W <sup>a</sup> | 31.41(17)  |                                        |            |
| <b>3<sup>ii</sup></b>    |            |                                        |            |
| Zn1–O1                   | 1.993(3)   | Zn1–O1W                                | 2.025(3)   |
| O1–Zn1–O1W               | 113.89(12) | O1–Zn1–O1W <sup>a</sup>                | 112.50(12) |
| O1–Zn1–O1 <sup>a</sup>   | 97.16(12)  | O1W–Zn1–O1W <sup>a</sup>               | 106.93(14) |
| <b>4<sup>iii</sup></b>   |            |                                        |            |
| Cd1–O1                   | 2.384(4)   | Cd1–O2                                 | 2.417(4)   |
| Cd1–O1W                  | 2.275(5)   |                                        |            |

|                         |            |                                       |            |
|-------------------------|------------|---------------------------------------|------------|
| O1-Cd1-O1W              | 134.10(16) | O1W-Cd1-O1W <sup>a</sup>              | 103.18(19) |
| O1-Cd1-O2               | 54.07(18)  | O1W-Cd1-O2 <sup>a</sup>               | 98.91(18)  |
| O1-Cd1-O1 <sup>a</sup>  | 78.15(14)  | O2-Cd1-O2 <sup>a</sup>                | 170.8(2)   |
| O1-Cd1-O1W <sup>a</sup> | 105.58(16) | O1W <sup>a</sup> -Cd1-O2 <sup>a</sup> | 86.81(18)  |
| O1-Cd1-O2 <sup>a</sup>  | 117.57(18) |                                       |            |
| <b>5<sup>iv</sup></b>   |            |                                       |            |
| Cd1-O1                  | 2.433(3)   | Cd1-O4                                | 2.329(4)   |
| Cd1-O1W                 | 2.222(3)   | Cd1-O5                                | 2.341(3)   |
| Cd1-O2                  | 2.278(3)   | Cd1-O1 <sup>a</sup>                   | 2.254(3)   |
| O1-Cd1-O1W              | 94.38(10)  | O1 <sup>a</sup> -Cd1-O1W              | 92.14(11)  |
| O1-Cd1-O2               | 54.97(11)  | O2-Cd1-O4                             | 150.00(12) |
| O1-Cd1-O4               | 105.85(12) | O2-Cd1-O5                             | 100.95(11) |
| O1-Cd1-O5               | 98.19(9)   | O1 <sup>a</sup> -Cd1-O2               | 93.08(11)  |
| O1-Cd1-O1 <sup>a</sup>  | 147.78(10) | O4-Cd1-O5                             | 55.66(11)  |
| O1W-Cd1-O2              | 107.95(13) | O1 <sup>a</sup> -Cd1-O4               | 104.88(12) |
| O1W-Cd1-O4              | 95.43(12)  | O1 <sup>a</sup> -Cd1-O5               | 91.23(9)   |
| O1W-Cd1-O5              | 150.67(11) |                                       |            |

<sup>i</sup>Symmetry code for **2**: <sup>a</sup> 1 - x, y, 1 - z. <sup>ii</sup>Symmetry code for **3**: <sup>a</sup> 1 - x, y, 2 - z. <sup>iii</sup>Symmetry code for **4**: <sup>a</sup> 1 - x, y, -z; <sup>iv</sup>Symmetry code for **5**: <sup>a</sup> x, -1 - y, -1/2 + z.

---

**Table S2** Hydrogen bond geometries in the crystal structures of **1-5**

| Complex                | D–H···A                     | H···A<br>(Å) | D···A (Å) | D–H···A (°) |
|------------------------|-----------------------------|--------------|-----------|-------------|
| <b>1<sup>i</sup></b>   | O3W–H6···O10 <sup>a</sup>   | 2.48         | 3.300(11) | 162         |
|                        | O4W–H7···O8 <sup>b</sup>    | 1.95         | 2.718(9)  | 150         |
|                        | O13W–H26···O11 <sup>b</sup> | 2.14         | 2.847(11) | 140         |
|                        | O1W–H1···O7 <sup>b</sup>    | 1.90         | 2.738(9)  | 168         |
|                        | C39–H39A···O3 <sup>c</sup>  | 2.56         | 3.430(13) | 150         |
|                        | O16W–H32···O7 <sup>d</sup>  | 2.57         | 3.287(10) | 143         |
|                        | O16W–H32···O8 <sup>d</sup>  | 2.14         | 2.891(9)  | 147         |
|                        | O5W–H9···O1                 | 1.94         | 2.719(9)  | 151         |
|                        | O6W–H11···O2                | 1.91         | 2.730(9)  | 161         |
|                        | O7W–H13···O13W              | 2.40         | 3.231(11) | 165         |
|                        | O7W–H14···O4                | 2.23         | 3.029(10) | 157         |
|                        | O8W–H16···O10               | 2.18         | 3.026(11) | 172         |
|                        | O12W–H23···O11              | 2.04         | 2.772(9)  | 144         |
|                        | O12W–H24···O16W             | 2.00         | 2.770(10) | 151         |
|                        | O14W–H28···O7               | 1.83         | 2.674(9)  | 172         |
|                        | O15W–H30···O1               | 2.21         | 2.890(10) | 137         |
| <b>2<sup>ii</sup></b>  | O1W–H1WA···O2 <sup>a</sup>  | 2.19         | 2.716(6)  | 120         |
|                        | O1W–H1WB···O3W <sup>a</sup> | 1.88         | 2.360(10) | 114         |
|                        | O3W–H3WB···O1W <sup>b</sup> | 1.70         | 2.360(10) | 132         |
|                        | O3W–H3WB···O2               | 2.41         | 3.017(12) | 129         |
| <b>3<sup>iii</sup></b> | O2W–H2WA···O1W <sup>a</sup> | 2.27         | 3.016(7)  | 147         |
|                        | O2W–H2WB···O1 <sup>b</sup>  | 1.98         | 2.817(7)  | 167         |
|                        | C11W–H11A···O2 <sup>c</sup> | 2.60         | 3.448(6)  | 148         |
| <b>4<sup>iv</sup></b>  | O1W–H1WA···O2W              | 2.54         | 3.317(5)  | 152         |
|                        | O1W–H1WB···O1 <sup>a</sup>  | 2.24         | 3.058(7)  | 162         |
|                        | O2W–H2WA···O2 <sup>b</sup>  | 1.98         | 2.756(6)  | 151         |
|                        | C11–H11A···O2W <sup>c</sup> | 2.59         | 3.423(7)  | 143         |
|                        | C14–H14A···O1 <sup>d</sup>  | 2.53         | 3.397(7)  | 151         |
| <b>5<sup>v</sup></b>   | O1W–H1WB···O5 <sup>a</sup>  | 1.94         | 2.753(4)  | 159         |
|                        | C2–H2···O2 <sup>a</sup>     | 2.51         | 3.335(5)  | 142         |
|                        | O1W–H1WA···O5 <sup>b</sup>  | 1.99         | 2.768(4)  | 152         |

<sup>i</sup>Symmetry codes for **1**: <sup>a</sup>  $-1 + x, 1 + y, z$ ; <sup>b</sup>  $-1 + x, y, z$ ; <sup>c</sup>  $1 + x, -1 + y, -1 + z$ ; <sup>d</sup>  $x, -1 + y, z$ . <sup>ii</sup>Symmetry codes for **2**: <sup>a</sup>  $x, -1 + y, z$ ; <sup>b</sup>  $x, 1 + y, z$ . <sup>iii</sup>Symmetry codes for **3**: <sup>a</sup>  $x, 1 + y, z$ ; <sup>b</sup>  $1 - x, y, 2 - z$ ; <sup>c</sup>  $3/2 - x, 1/2 + y, 2 - z$ . <sup>iv</sup>Symmetry codes for **4**: <sup>a</sup>  $1 - x, -1 + y, -z$ ; <sup>b</sup>  $1 - x, y, 1 - z$ ; <sup>c</sup>  $x, 1 + y, z$ ; <sup>d</sup>  $3/2 - x, 1/2 + y, -z$ . <sup>v</sup>Symmetry codes for **5**: <sup>a</sup>  $x, -1 - y, 1/2 + z$ ; <sup>b</sup>  $x, -1 + y, z$ .

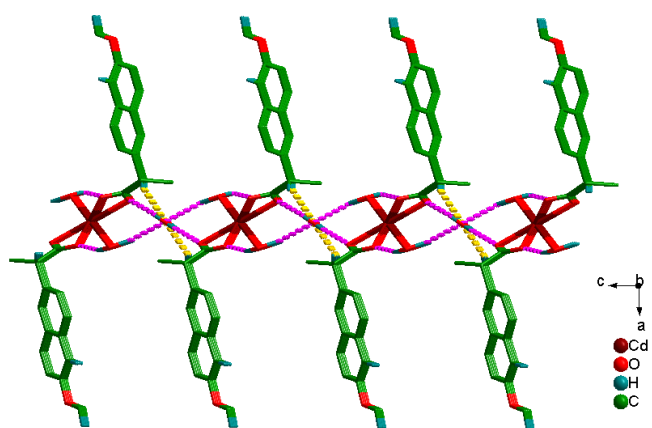

**Fig. S16.** A 2D layer along the *b* axis in **4**.

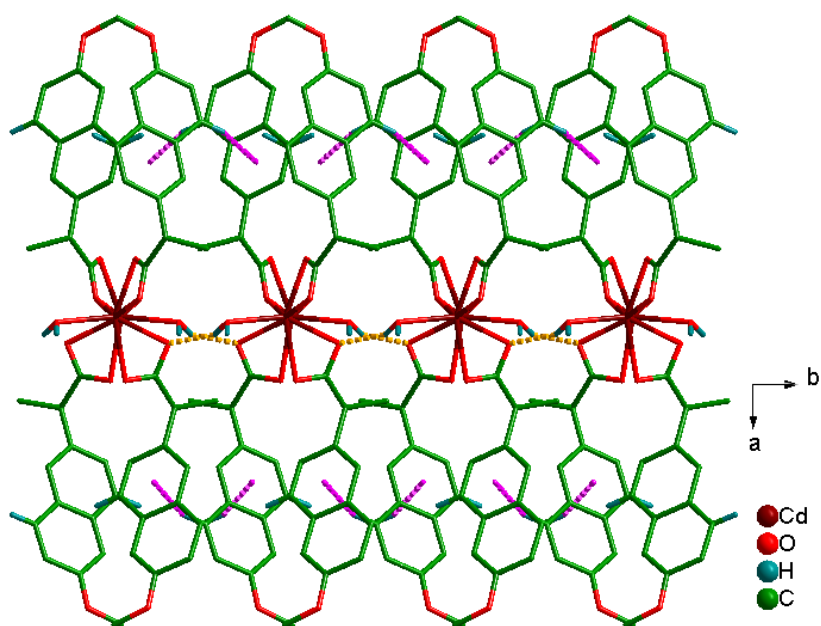

**Fig. S17.** A 2D layer along the *c* axis in **5**.

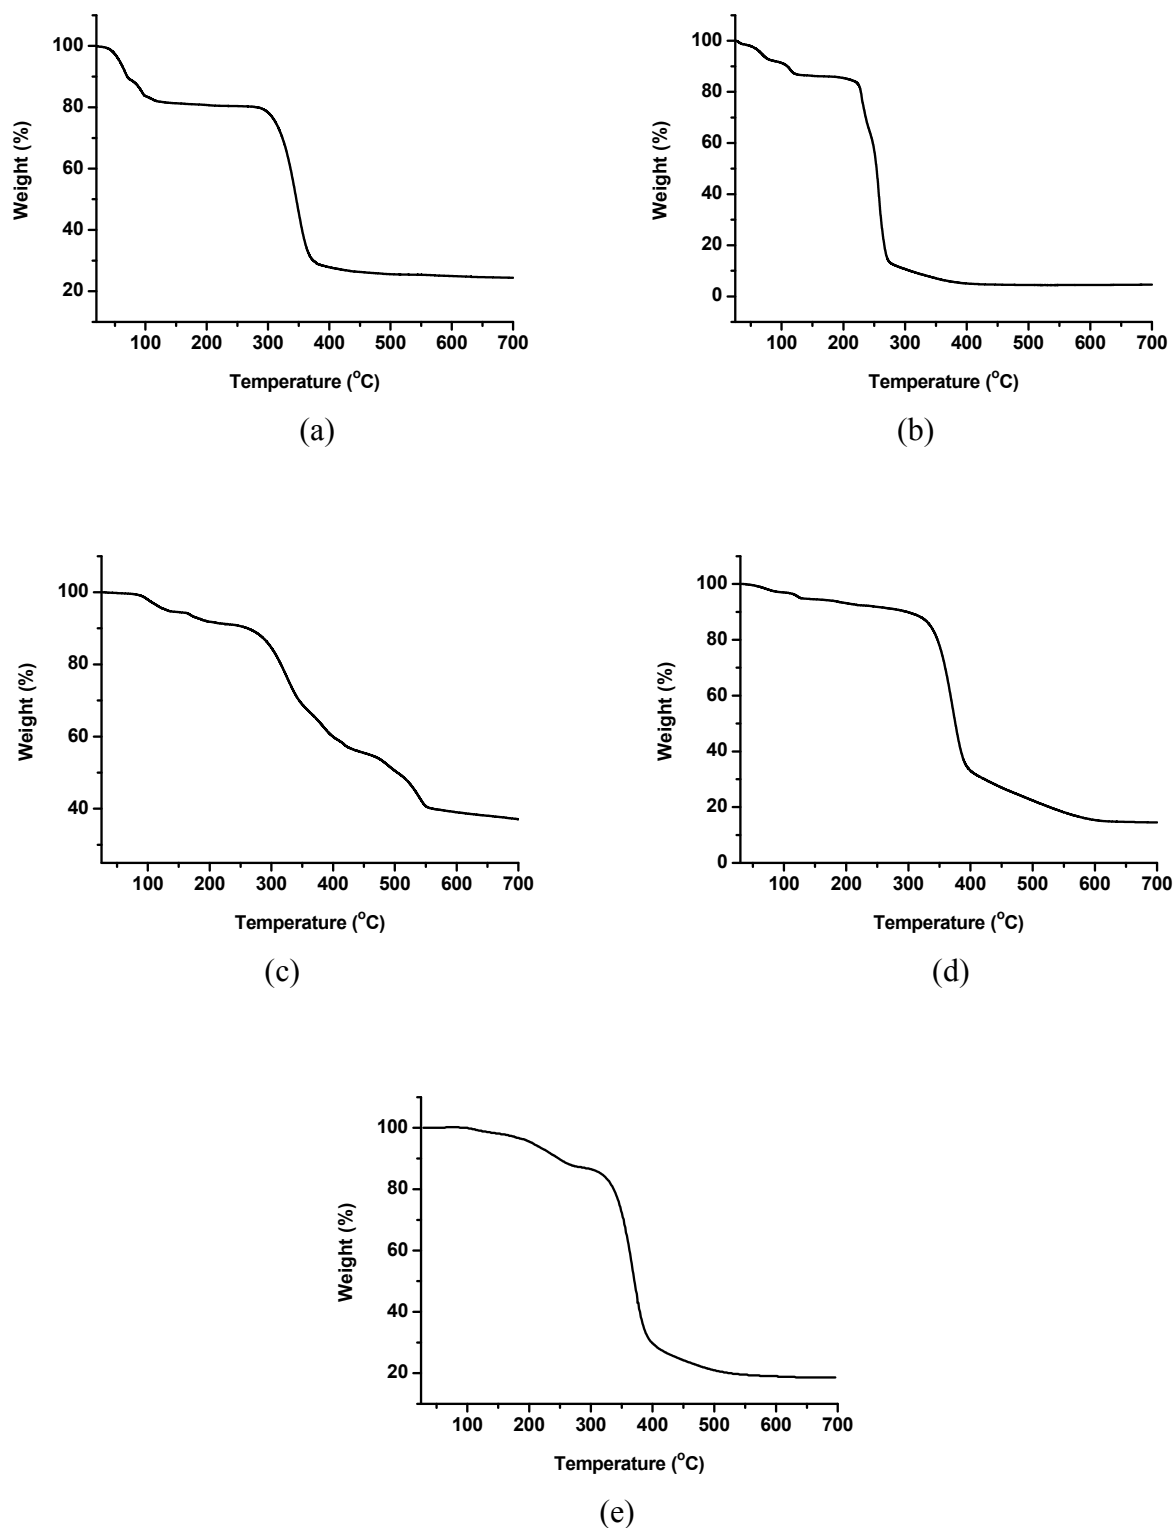

**Fig. S18.** TGA curves of complexes 1-5; (a) for 1; (b) for 2; (c) for 3; (d) for 4; (e) for 5.

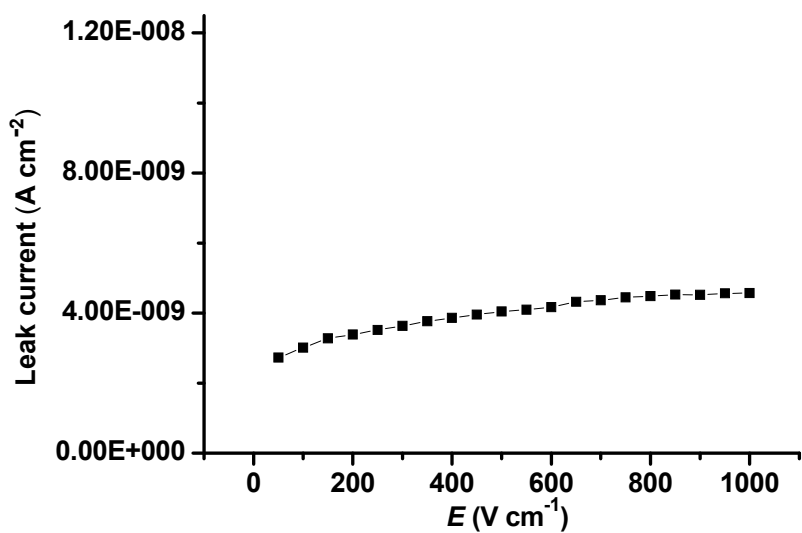

(a)

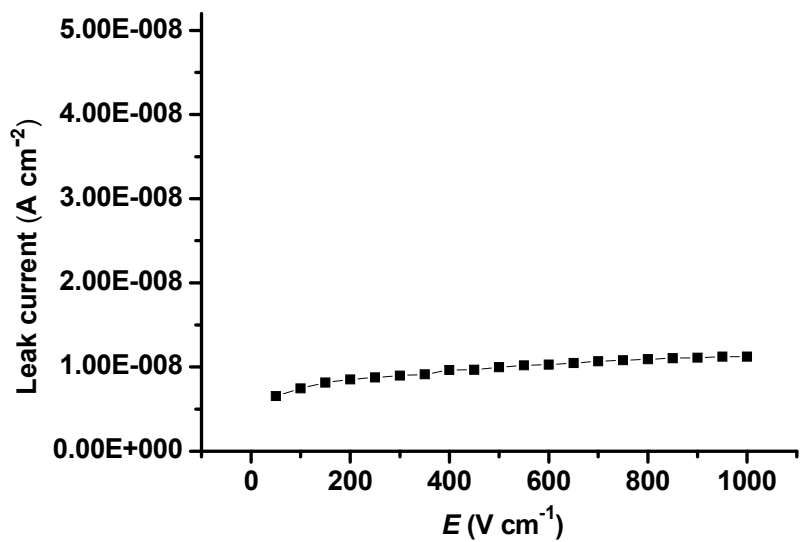

(b)

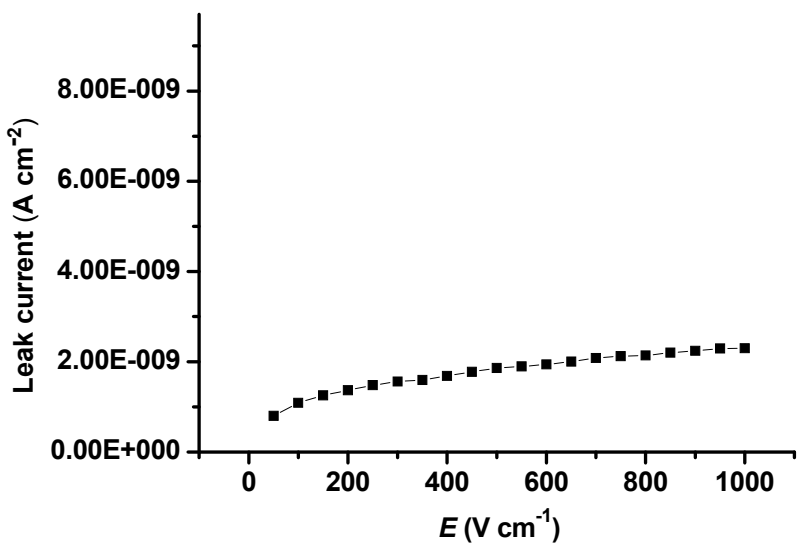

(c)



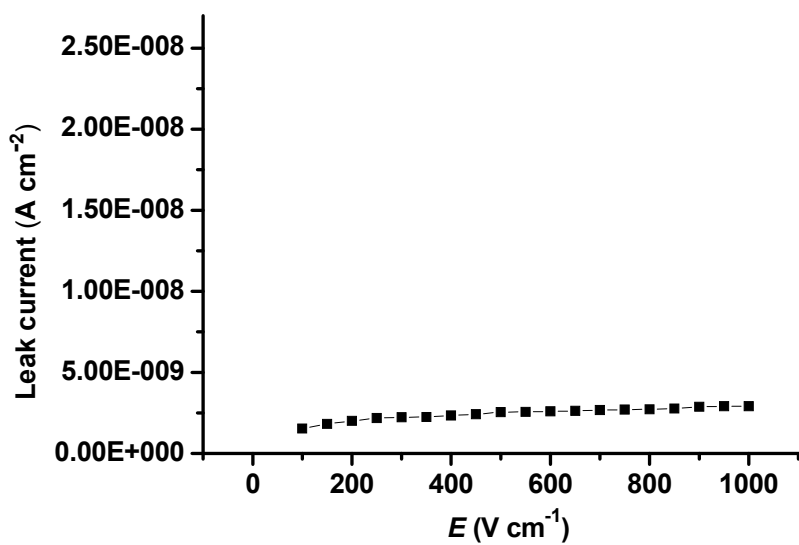

(d)

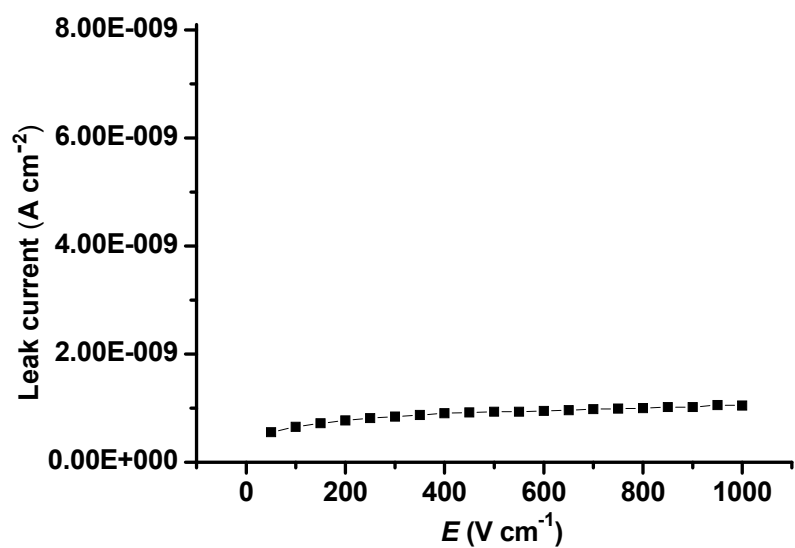

(e)

**Fig. S19** Plots of leakage current in compounds **1** (a), **2**(b), **3**(c), **4**(d), and **5**(e), respectively.
